# Supplementary material for: Functionally Antagonistic Transcription Factors IRF1 and IRF2 Regulate the Transcription of the Dopamine Receptor D2 Gene Associated with Aggressive Behavior of Weaned Pigs
Source: MDPI journal article supplement (doi:10.3390/biology11010135), 2022-01-14
Supplement: s1 [file s1]

**Table S1** Total primers used and small RNA sequence

| Name                     | Sequence (5'-3')                          |
|--------------------------|-------------------------------------------|
| DRD2-P1-F                | CG <u>ACGCGT</u> CGGGGGTTGTGGAGGGATCGCT   |
| DRD2-P2-F                | CG <u>ACGCGT</u> CGGGGCACCAGCTAGTAAGACG   |
| DRD2-P3-F                | CG <u>ACGCGT</u> CGCTGGGAATGGGGGTGATGAT   |
| DRD2-P-R                 | CCC <u>AAGCTT</u> GGGGCCAGGACCCAGCAAATCGG |
| PCR-DRD2-rs1110730503 -F | CGAGCGGGCAGAGTTTCCAA                      |
| PCR-DRD2-rs1110730503 -R | CCTCCCTCCTCGACTGAATC                      |
| PCR-DRD2-rs1107428594-F  | GGAAGCTATCTGAGTGAGTC                      |
| PCR-DRD2-rs1107428594-R  | CAGGATGAATCAGGAATAAG                      |
| DRD2-A/T-WT-F            | <u>CGACGCGT</u> CGCAACTGCCCCATAGGGAGAA    |
| DRD2-A/T-WT-R            | CCC <u>AAGCTT</u> GGGGGAGAGTAGAGCGAGAACCA |
| DRD2-A/T-MUT-F           | CTCCACATTTAaGTGACTTGAGACTTTTCAGCTTCTAAG   |
| DRD2-A/T-MUT-R           | GTCACiTAAATGTGGAGATGCGAAAACAACCC          |
| IRF1-WT-F                | CG <u>ACGCGT</u> CGCCATCTTAGGTCAATTCCAA   |
| IRF1-WT-R                | CCC <u>AAGCTT</u> GGGACCCCAAAGTAACACCCTAT |
| IRF1-MUT-F               | TCgggaaCTGACCTCTTGGATGCAAAGTGC            |
| IRF1-MUT-R               | AAGAGGTCAGttcccGAGGAGCCTGGTCCAAGGAC       |
| IRF2-WT-F                | CG <u>ACGCGT</u> CGGGGCACCAGCTAGTAAGACG   |
| IRF2-WT-R                | CCC <u>AAGCTT</u> GGGGCCAGGACCCAGCAAATCGG |
| IRF2-MUT-F               | CTCCACATTTcctgtACTTGAGACTTTTCAGCTTCTAAGGA |
| IRF2-MUT-R               | GTacaggAAATGTGGAGATGCGAAAACAA             |
| ChIP-IRF1-F              | AGCACAGAACTAACCAAAGG                      |
| ChIP-IRF1-R              | TTTGAGGAGTCAGAGTGTAG                      |
| ChIP-IRF2-F              | CGAGCGGGCAGAGTTTCCAA                      |
| ChIP-IRF2-R              | CGGCACATTAGGGTGTAGGA                      |

|                     |                        |
|---------------------|------------------------|
| ChIP-Non-specific-F | GGATTCAGTCTGGAAGGAGC   |
| ChIP-Non-specific-R | GCAGGTCAGAAAATACGAGC   |
| siIRF1-1 sense      | GGGCUGAUCUGGAUUAUATT   |
| siIRF1-1 antisense  | UAUUAUCCAGAUCAAGCCCTT  |
| siIRF1-2 sense      | CUCCCUGCCAGAUUAUUGAATT |
| siIRF1-2 antisense  | UUCAAUAUCUGGCAGGGAGTT  |
| siIRF2-1 sense      | GGGCUUAGUAAUGGAGUAATT  |
| siIRF2-1 antisense  | UUACUCCAUAUACUAAGCCCTT |
| siIRF2-2 sense      | GCACCACUCUUUAGAAACUTT  |
| siIRF2-2 antisense  | AGUUUCUAAAGAGUGGUGCTT  |

**Table S2** Primer sequences for transcripts used in real-time quantitative PCR

| Gene  | Primer sequence (5'→3')         | Tm | Product length (bp) | amplification efficiency |
|-------|---------------------------------|----|---------------------|--------------------------|
| BAX   | Forward: CCGAAATGTTTGCTGACG     | 87 | 154                 | 102%                     |
|       | Reverse: AGCCGATCTCGAAGGAAGT    |    |                     |                          |
| BCL-2 | Forward: TTCTTTGAGTTCGGTGGGG    | 87 | 195                 | 101%                     |
|       | Reverse: CCAGGAGAAATCAAATAGAGGC |    |                     |                          |
| DRD2  | Forward: TGGCAAACCCGGACCTCCC    | 87 | 227                 | 105%                     |
|       | Reverse: TGGGGTTCACGGCGCTGTTG   |    |                     |                          |
| IRF1  | Forward: GTGAAGGACCAGAGCAGGAA   | 87 | 276                 | 107%                     |
|       | Reverse: TGACAGTGCTGGAGTAAGGG   |    |                     |                          |
| IRF2  | Forward: TGGACAGCACCATTGAGGAT   | 88 | 304                 | 108%                     |
|       | Reverse: TTGGAAGTGACGAAGGTTGC   |    |                     |                          |
| GAPDH | Forward: GATGGTGAAGGTCGGAGTG    | 88 | 446                 | 107%                     |
|       | Reverse: CGAAGTTGTCATGGATGACC   |    |                     |                          |

**Table S3** The promoter prediction of porcine dopamine receptor D2 (*DRD2*) gene by Promoter 2.0

|                    | position    | score | likelihood          |
|--------------------|-------------|-------|---------------------|
| <b><i>DRD2</i></b> | 400 (-1900) | 0.545 | Marginal prediction |
|                    | 1800(-500)  | 0.577 | Marginal prediction |

**Table S4** The promoter prediction of porcine *DRD2* gene by Neural Network Promoter Prediction

|                    | Start      | End        | Score | Promoter Sequence                                   |
|--------------------|------------|------------|-------|-----------------------------------------------------|
| <b><i>DRD2</i></b> | 432(-1818) | 482-1768)  | 0.91  | GGGGCGGGGCCTGTCTCAGGGGCGGGGCCCGAGGCGCCCCATGGCCCCGC  |
|                    | 448(-182)  | 498(-1752) | 0.88  | CAGGGGCGGGGCCCGAGGCGCCCCATGGCCCCGCCCCCTCCCTCCCGCGC  |
|                    | 573(-1677) | 623(-1627) | 0.84  | CTCCGCGCCGGGTCCCTGCGCCTCACGCCCCGCCCCGCGCCGGCCCCGCCC |
|                    | 584(-1666) | 634(-1616) | 0.81  | GTCCCTGCGCCTCACGCCCCGCCCCGCGCCGGCCCCGCCCCACCCCGCCCC |
|                    | 607(-1643) | 657(-1593) | 0.87  | CGCGCCGGCCCCGCCCCACCCCGCCCCGCCGCGGCGGTCCACTGCTCCC   |
|                    | 636(-1614) | 686(-1564) | 0.82  | CGCGGCCGGTCCACTGCTCCCAGCGGGTCCGAGCCGGCCGAGCGGCTGCC  |
|                    | 683-1567)  | 733(-1517) | 0.89  | GCCCGCCGGGGCTCTGAACGGCGCGGGCGGGGAGCCAGGGACCCGC      |

**Table S5** The CpG islands prediction of porcine *DRD2* gene by Meth Primer

|                 | <b>Size(bp)</b> | <b>Start</b> | <b>End</b>  |
|-----------------|-----------------|--------------|-------------|
| <b>Island 1</b> | 507             | 356 (-1894)  | 862 (-1388) |
| <b>Island 2</b> | 421             | 874 (-1376)  | 1294 (-956) |
| <b>Island 3</b> | 106             | 1391 (-859)  | 1496 (-754) |
| <b>Island 4</b> | 115             | 1597 (-653)  | 1711 (-539) |
