# Supplementary figures and images for: Functionally Antagonistic Transcription Factors IRF1 and IRF2 Regulate the Transcription of the Dopamine Receptor D2 Gene Associated with Aggressive Behavior of Weaned Pigs
Source: MDPI journal article supplement (doi:10.3390/biology11010135), 2022-01-14

Figure S1

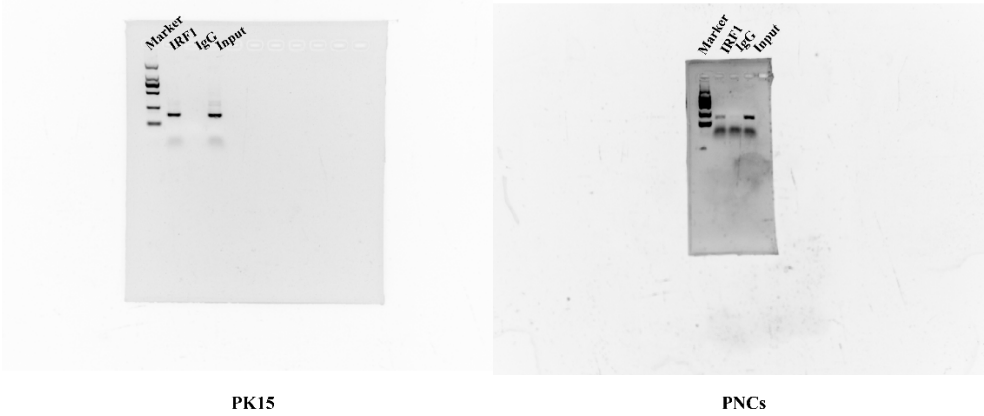

Figure S2

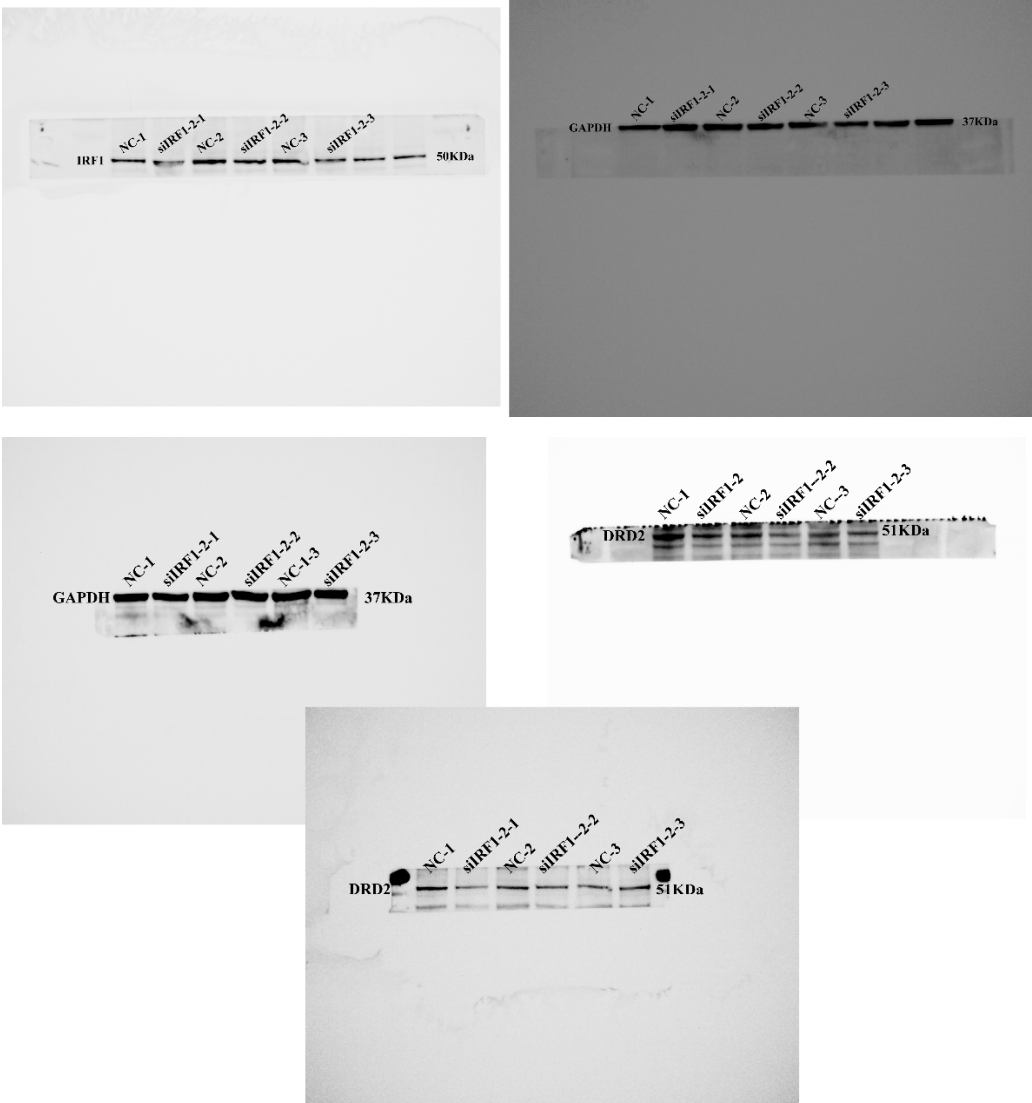

Figure S3

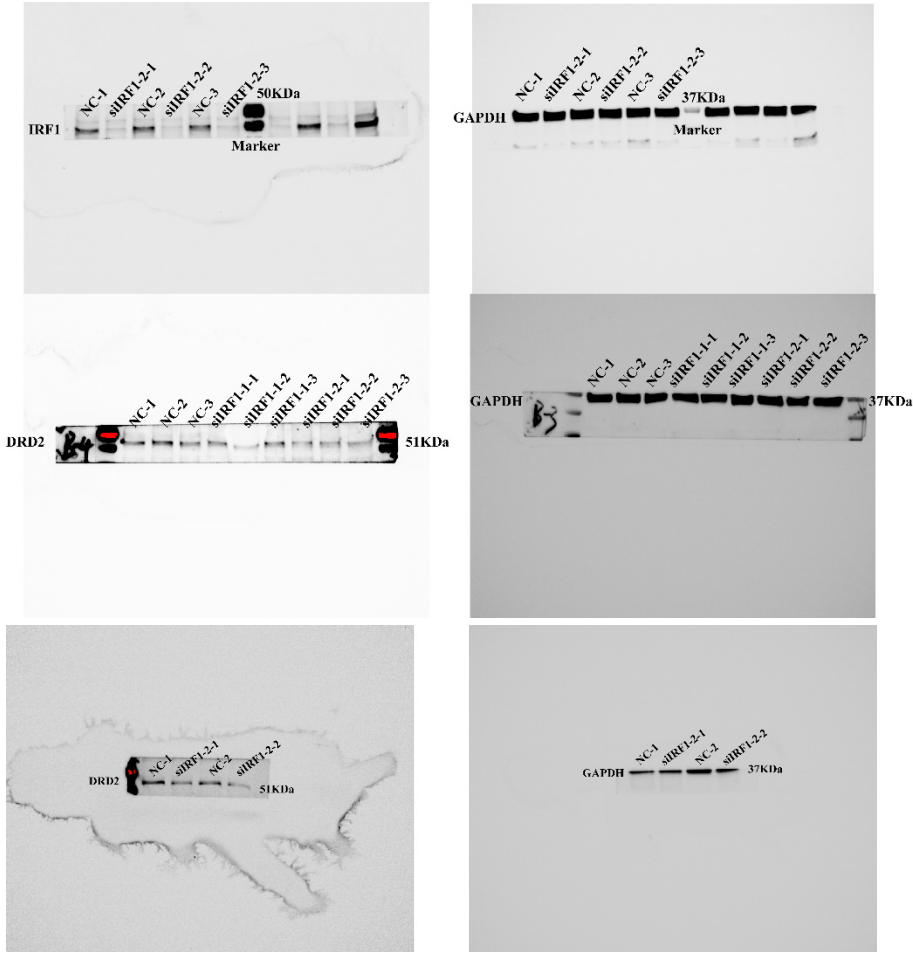

Figure S4

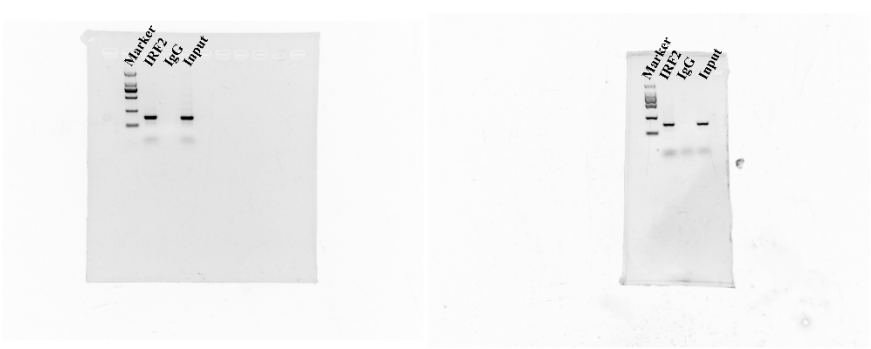

PK15

PNCs

Figure S5

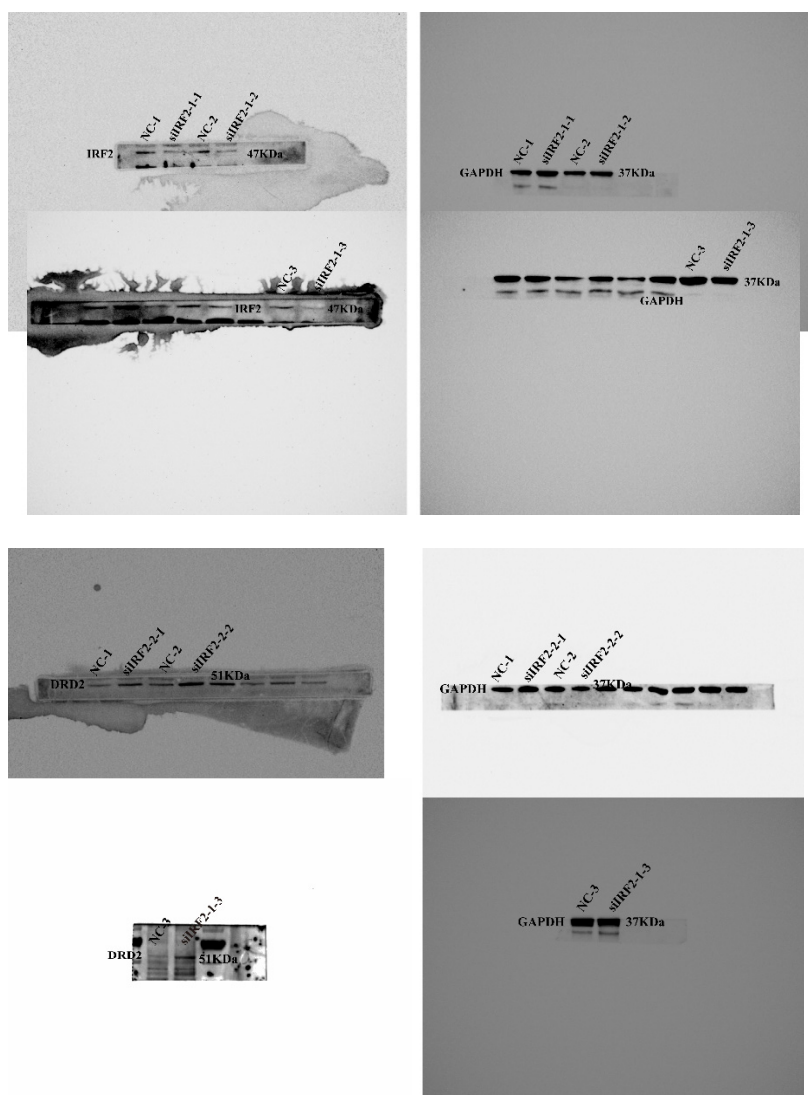

Figure S6

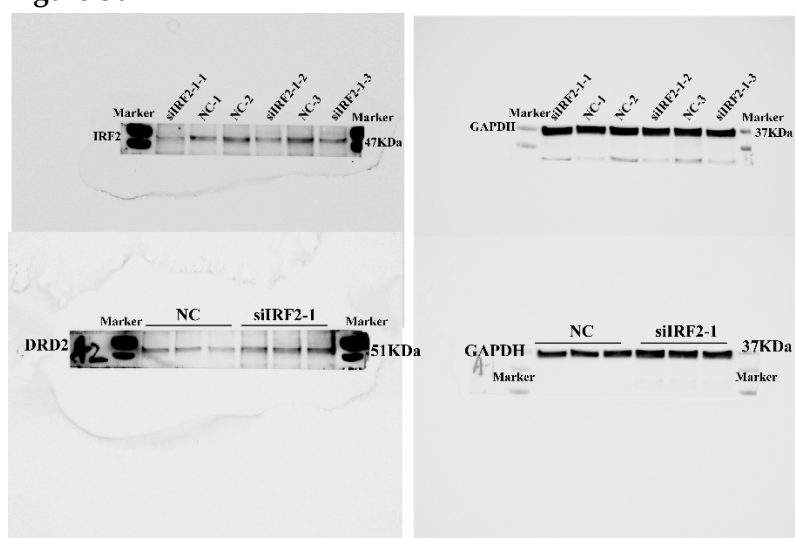

Figure S7

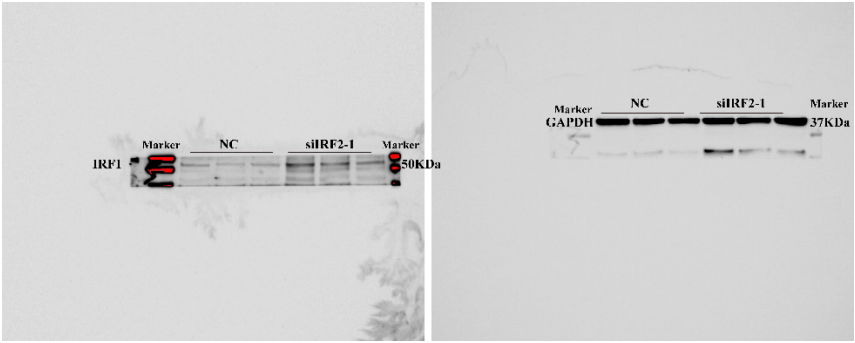

Figure S8

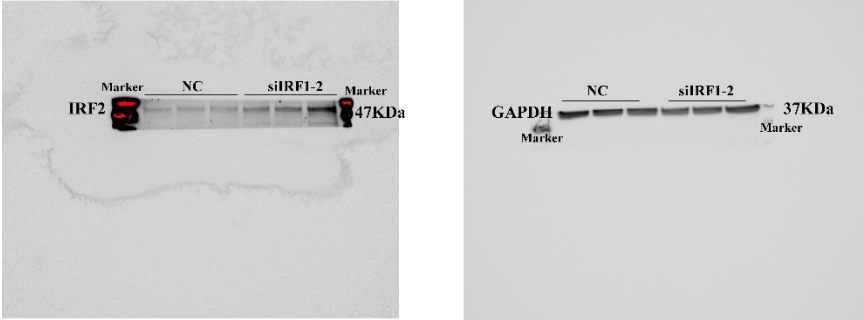

Supplement: s1 [file s1]
